# Supplementary material
Source: PubMed Central journal article supplement (PMC2577279)
Supplement: pp.108.123356_1.pdf [file pp.108.123356_1.pdf]

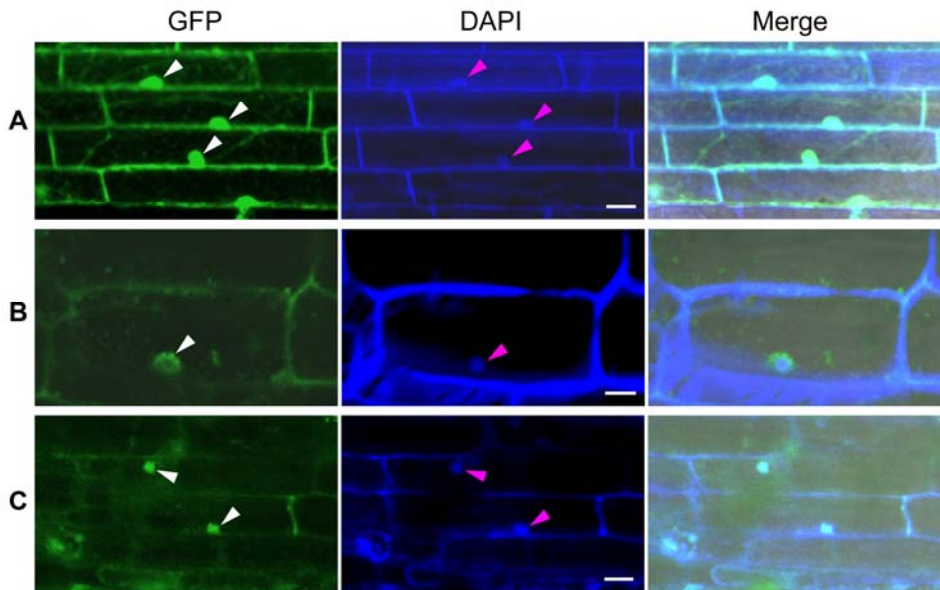

**Supplemental Figure 1.** Localization of GFP, XA27-GFP and XA27G-GFP in leaf sheath cells of transgenic plants and 4',6-Diamidino-2-phenylindole (DAPI) staining of nuclei. A, Leaf sheath cells of L8 of  $P_{Ubi}:GFP:T_{Nos}$ . B, Leaf sheath cells of L9 of  $P_{Ubi}:XA27-GFP:T_{Nos}$ . C, Leaf sheath cells of L18G of  $P_{Ubi}:XA27G-GFP:T_{Nos}$ . GFP fluorescence at nuclei or perinuclear region is indicated with white arrowheads. The DAPI-stained nuclei are indicated with magenta arrowheads. Bars = 10  $\mu$ m.
