# Supplementary material
Source: PubMed Central journal article supplement (PMC2577279)
Supplement: pp.108.123356_2.pdf [file pp.108.123356_2.pdf]

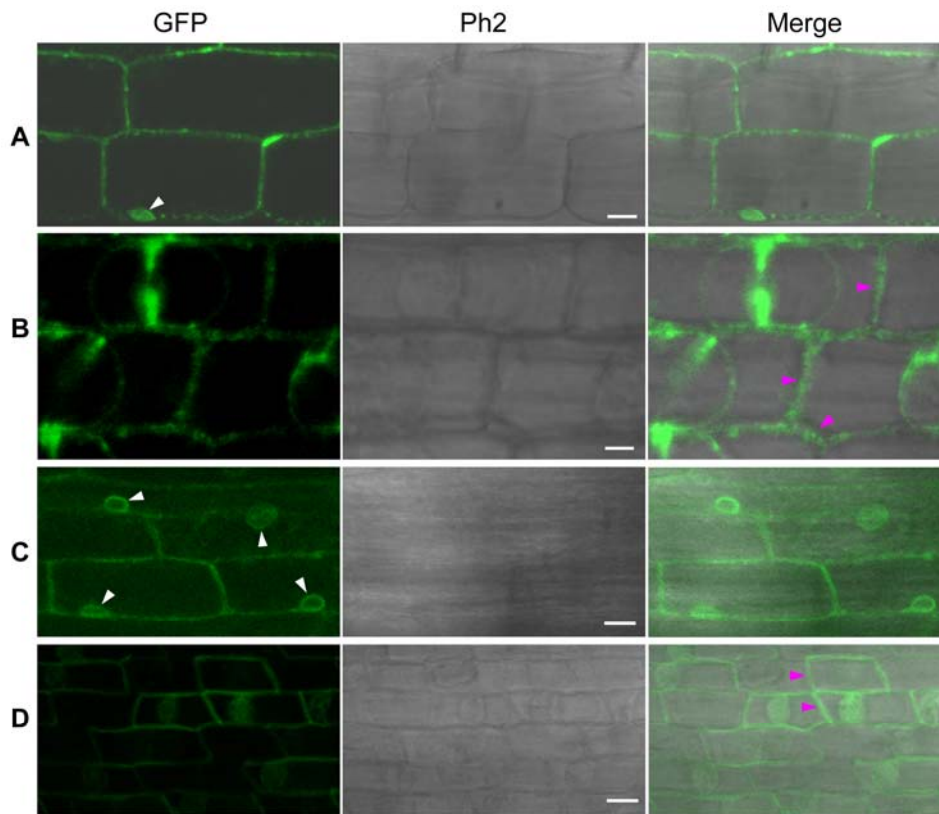

**Supplemental Figure 2.** Localization of XA27-GFP in leaf sheath and root cells of L22 of *P<sub>Xa27</sub>:XA27-GFP:T<sub>Xa27</sub>*. A, Leaf sheath cells. B, Leaf sheath cells after plasmolysis. C, Root cells. D, Root cells after plasmolysis. The nuclei are indicated with white arrowheads. Cell walls are indicated with magenta arrowheads. Ph2, Phase Contrast 2. Bars = 10  $\mu$ m.
