# Supplementary material
Source: PubMed Central journal article supplement (PMC2577279)
Supplement: pp.108.123356_3.pdf [file pp.108.123356_3.pdf]

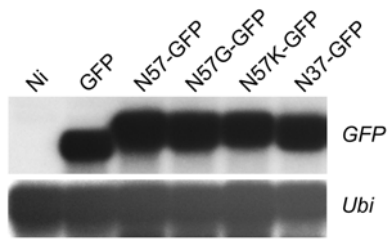

**Supplemental Figure 3.** Transgene expression in GFP-tagged lines. Transcripts of the transgenes in GFP tagging lines were determined by RNA gel blot analysis. The RNA loading was monitored by determining the expression of rice ubiquitin gene 1 (*Ubi*). Ni, Nipponbare; GFP, L8 of  $P_{Ubi}:GFP:T_{Nos}$ ; N57-GFP, L12 of  $P_{Ubi}:N57-GFP:T_{Nos}$ ; N57G-GFP, L5 of  $P_{Ubi}:N57G-GFP:T_{Nos}$ ; N57K-GFP, L3 of  $P_{Ubi}:N57K-GFP:T_{Nos}$ ; N37-GFP, L2 of  $P_{Ubi}:N37-GFP:T_{Nos}$ .
