# Supplementary material
Source: PubMed Central journal article supplement (PMC2577279)
Supplement: pp.108.123356_4.pdf [file pp.108.123356_4.pdf]

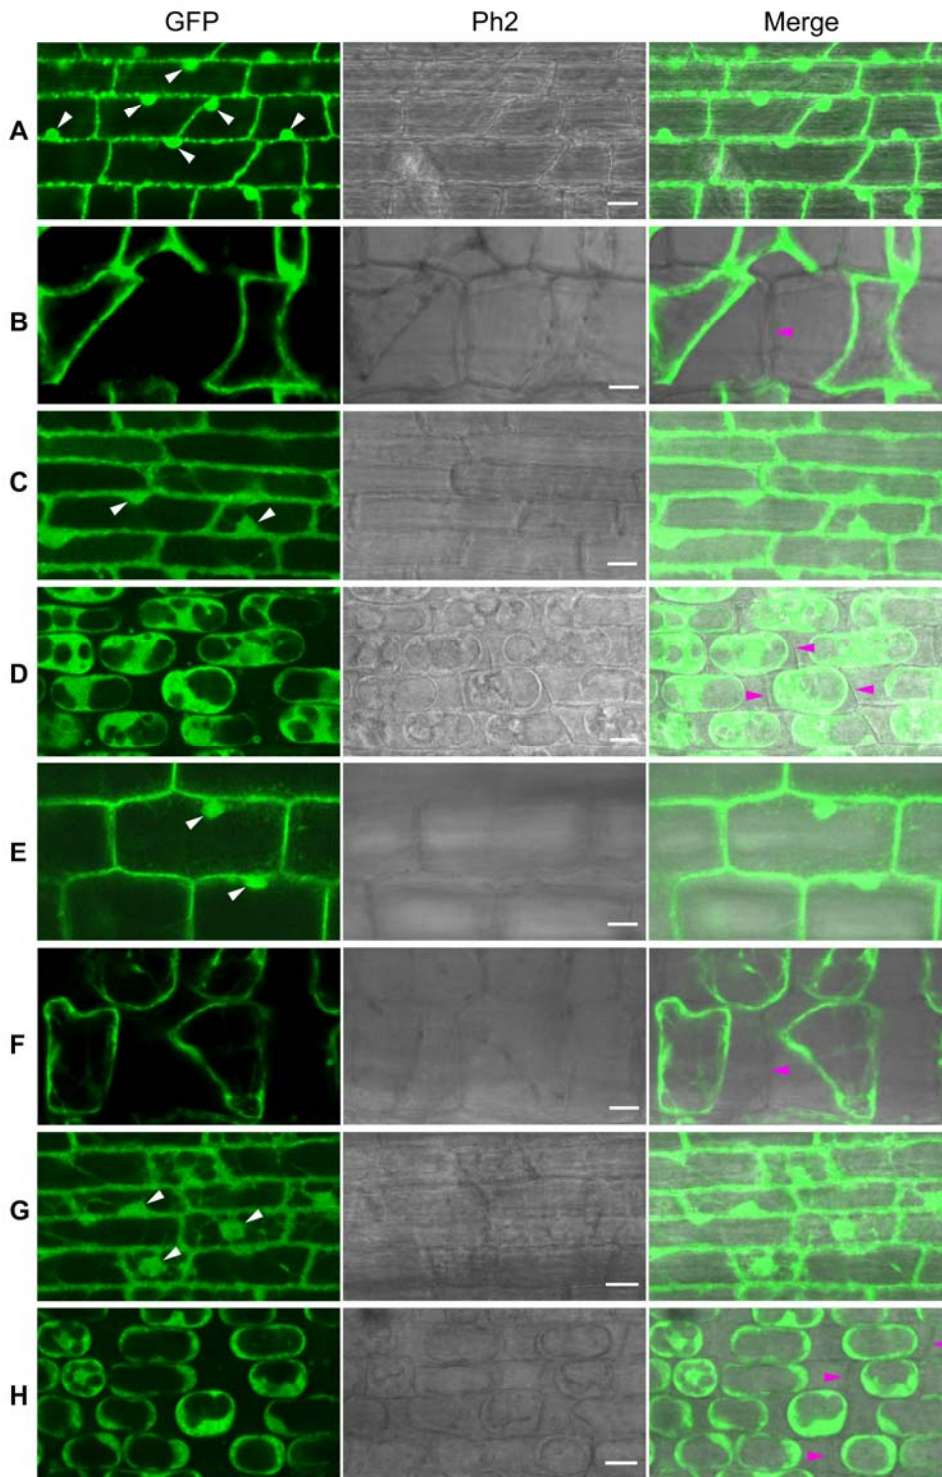

**Supplemental Figure 4.** Localization of N57G-GFP and N57K-GFP in leaf sheath and root cells of transgenic plants. A, Leaf sheath cells of L5 of  $P_{Ubi}:N57G-GFP:T_{Nos}$ . B, Leaf sheath cells of L5 after

plasmolysis. C, Root cells of L5. D, Root cells of L5 after plasmolysis. E, Leaf sheath cells of L3 of *P<sub>Ubi</sub>:N57K-GFP:T<sub>Nos</sub>*. F, Leaf sheath cells of L3 after plasmolysis. G, Root cells of L3. H, Root cells of L3 after plasmolysis. The nuclei are indicated with white arrowheads. Cell walls are indicated with magenta arrowheads. Ph2, Phase Contract 2. Bars = 10  $\mu$ m.
