# Supplementary material
Source: PubMed Central journal article supplement (PMC2577279)
Supplement: pp.108.123356_5.pdf [file pp.108.123356_5.pdf]

## **Supplemental Protocol**

### **4',6-Diamidino-2-phenylindole Staining and GFP Fluorescence**

About 3×3 mm<sup>2</sup> leaf sheath sections were stained in 0.5mg ml<sup>-1</sup> 4',6-Diamidino-2-phenylindole (DAPI, Invitrogen) solution for about one hour and examined under a confocal microscope Zeiss LSM 510 META. DAPI staining and GFP fluorescence were examined using the excitation/emission combination of 405/420-480 nm BP and 488/505-530 nm BP, respectively. Transmission images were taken simultaneously by phase contrast 2 (Ph2) channel.
